# Supplementary material for: Development and Evaluation of a Training Program for Community-Based Participatory Research in Breast Cancer
Source: Int J Environ Res Public Health. 2019 Nov 6;16(22):4310. doi: 10.3390/ijerph16224310 (PMC6888545; doi:10.3390/ijerph16224310)
Supplement: Supplementary file 1 [file ijerph-16-04310-s001.pdf]

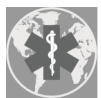

This table S1 shows the sessions developed to address each objective, the format used, and what training method was used.

**Table S1.** CRIBS COURSE OBJECTIVES, SESSION, AND TRAINING METHODS.

| Training Objective                                                                                                          | Topic                                                               | Learning Outcome                                                                                                                                                                                    | Format | Training Method                         |
|-----------------------------------------------------------------------------------------------------------------------------|---------------------------------------------------------------------|-----------------------------------------------------------------------------------------------------------------------------------------------------------------------------------------------------|--------|-----------------------------------------|
| <i>Training Objective 1.<br/>Creating and maintaining community-based participatory research (CBPR) teams.</i>              | Overview of CBPR                                                    | Learn about and discuss CBPR                                                                                                                                                                        | FTF    | Presentation & Discussion               |
|                                                                                                                             | Case Study: CBPR as Relevant, Rigorous Research                     | Hear from a CBPR team about their experience conducting research                                                                                                                                    |        | Presentation & Discussion               |
|                                                                                                                             | Vision                                                              | Create their team vision                                                                                                                                                                            |        | Individual and Small Group Activity     |
|                                                                                                                             | CBPR Benefits and Challenges                                        | Understand the benefits and challenges of CBPR for both the community and academic partners and will be able to identify benefits and challenges of participating in CBPR for their own partnership | OLT    | Video & Discussion                      |
|                                                                                                                             | Seeing Differently                                                  | See how individual experiences shape perspective and perception of events                                                                                                                           | FTF    | Interactive group exercise              |
|                                                                                                                             | Partnership Agreements                                              | Create a draft of their partnership agreements and share it with others.                                                                                                                            | OLT    | Team Posting & Discussion               |
|                                                                                                                             | Institutionalization and Sustainability of CBPR                     | Report on their goal(s) for increasing the use of CBPR in their organization, institution, or community, and the resources they need or have to support their effort.                               |        | Fellows Posting & Discussion            |
|                                                                                                                             | Institutionalization of CBPR                                        | Learn how to ensure their institution/organization is supportive of CBPR and institutionalizes the method.                                                                                          | FTF    | Small Group Activity                    |
|                                                                                                                             | Partnership Assessment                                              | Learn to Create a self-assessment tool, conduct a self-assessment, and debrief the results.                                                                                                         |        | Team Activity & Discussion              |
| <i>Training Objective 2.<br/>Understanding the science of the environmental causes of and disparities in breast cancer.</i> | Risk Factors for Breast Cancer: What We Know and What We Don't Know | Learn about the general risk factors of breast cancer and the complexity of risk factors                                                                                                            | FTF    | Presentation & Discussion               |
|                                                                                                                             | New Paradigm of Breast Cancer Causation                             | Learn about the "new paradigm" of Breast Cancer causation and prevention                                                                                                                            |        |                                         |
|                                                                                                                             | Pathways to Breast Cancer                                           | Understand inherited genetics; genetic damage; epigenetics; susceptibility to developmental disruption of hormones; endocrine disruptors                                                            |        |                                         |
|                                                                                                                             | Role of Services and Screening in Health Disparities                | Learn about the role of services and screening in answering questions about the disparities in breast cancer.                                                                                       |        |                                         |
|                                                                                                                             | Film Screening: <i>Unnatural Causes</i>                             | Learn how population health is shaped by the social and economic conditions in which we are born, live and work.                                                                                    |        | Video & Discussion                      |
|                                                                                                                             | Appreciating Differences                                            | Learn their Myers-Briggs type and identify work and communication differences within their partnership                                                                                              |        | Presentation, small group and team work |
|                                                                                                                             | Moving From Partners to Teams and How to Handle It!                 | Learn about the theories of how groups form, including through conflict.                                                                                                                            |        | Presentation & Discussion               |
|                                                                                                                             | Team Agreements                                                     | Teams will begin developing team agreements.                                                                                                                                                        |        | Team Activity                           |
|                                                                                                                             | The Role of Social Factors in Breast Cancer                         | Understand how stressors impact biology, including conceptualization of racism and segregation as chronic stressors.                                                                                |        | Presentation & Discussion               |
|                                                                                                                             | Film Screening and Discussion: <i>Living Downstream</i>             | Learn about environmental health activism and the value of data.                                                                                                                                    |        | Video & Discussion                      |
|                                                                                                                             | Case Studies: CHAMACOS Study                                        | Learn about the CHAMACOS study (pesticides in farm worker community) as well as the experience and lessons Learned in partnering with community members                                             |        | Presentation & Discussion               |
|                                                                                                                             | Bus Tour                                                            | Have an opportunity to tour various environmental and disparities sites in Oakland.                                                                                                                 |        | Large Group Activity                    |
|                                                                                                                             | Research on Discrimination and Health                               | Learn about the impact of discrimination on health and suspected links to cancer.                                                                                                                   |        | Presentation & Discussion               |
|                                                                                                                             | Breast Cancer Disparities and the Environment                       | Learn what is known about breast cancer disparities and the environment.                                                                                                                            |        |                                         |
| <i>Training Objective 3.</i>                                                                                                | Research Ethics                                                     | Understand their obligations to protect the rights and                                                                                                                                              | OLT    | Video &                                 |

|                                                              |                                                             |                                                                                                                              |       |                             |
|--------------------------------------------------------------|-------------------------------------------------------------|------------------------------------------------------------------------------------------------------------------------------|-------|-----------------------------|
| Creating a pathway from idea to funded research project.     |                                                             | welfare of subjects in research and how the ethical principles relate to CBPR.                                               |       | Discussion                  |
|                                                              | California Cancer Registry and other Important Data Sources | Learn about different data sources that are available to them.                                                               | FTF   | Presentation & Discussion   |
|                                                              | Scientific Methods Overview                                 | Learn the various scientific methods that can be used to answer different Research Questions.                                |       | Large Group Activity        |
|                                                              | Research Questions and Methods                              | Create research questions and possible research designs for those research questions.                                        |       |                             |
|                                                              | Impact of Scientific Methods on Community                   | Engage with research methods in considering research ethics.                                                                 |       |                             |
|                                                              | Research Questions                                          | Teams will work on their Research Questions.                                                                                 | OLT   | Team Posting & Discussion   |
|                                                              | Team Work & Staff TA Round Robin                            | Time for Teams to meet with staff, and on their own, to discuss next steps.                                                  | TA    | Team Activity               |
|                                                              | Method Plan Development                                     | Learn the best practices in how to Create a strong (qualitative and quantitative) method plan, using theoretical frameworks. | FTF   | Presentation & Discussion   |
|                                                              | Study Results Dissemination & Impact                        | Learn about how to have impact & disseminating study results in CBPR.                                                        |       |                             |
|                                                              | Revised Research Question                                   | Work together to revise their Research Questions based on feedback.                                                          | OLT   | Team Posting & Discussion   |
|                                                              | Team Work & Staff TA Round Robin                            | Time for Teams to meet with staff, and on their own, to discuss next steps.                                                  | TA    | Team Activity               |
|                                                              | Team Work & Staff TA Round Robin                            | Time for Teams to meet with staff, and on their own, to discuss next steps.                                                  | FTF   | Team Posting & Discussion   |
|                                                              | Preparation for Concept Paper submission                    | Refine research question and strengthen their conceptual framework.                                                          | Phone | Team Activity               |
|                                                              | Review of Concept Paper Feedback                            | Incorporate staff feedback to strengthen research plan.                                                                      |       |                             |
|                                                              | Cancer Mapping Webinar                                      | Participants will Learn the utility of cancer mapping and how to incorporate the data into their research.                   | Web   | Presentation & Discussion   |
| Training Objective 4. Writing successful grant applications. | Literature Review                                           | Learn about conducting literature reviews.                                                                                   | OLT   | Instructions & Discussion   |
|                                                              | Components of a Research Plan                               | Learn about the various components of a research grant proposal and begin working on their Research Plan.                    | FTF   | Presentation & Discussion   |
|                                                              | Institutional Review Boards: Academic and Community-Based   | Learn how to work with IRB and IRB applications, especially with CBPR projects, and the value of community-based IRB.        |       |                             |
|                                                              | Grant Writing from the Grant Reviewers Perspective          | Understand about the grant review process and the basic skills necessary in grant writing.                                   |       |                             |
|                                                              | Technical Assistance Needs                                  | Identify TA needs.                                                                                                           | OLT   | Team Posting & Discussion   |
|                                                              | Funders Panel                                               | Understand the skills needed in identifying grant opportunities.                                                             | FTF   | Presentation & Discussion   |
|                                                              | CBPR Budgets                                                | Learn the various ways to manage budgets for CBPR.                                                                           |       |                             |
|                                                              | Revised Research Questions                                  | Work together to revise their Research Questions based on feedback.                                                          | OLT   | Team Posting & Discussion   |
|                                                              | Review Plans for Grant Proposal Development                 | Finalize plan for grant proposals.                                                                                           | Phone | Team Activity               |
|                                                              | Application Preparation and Grantsmanship Webinar           | Learn grantsmanship skills and what is needed to apply for a CBPR grant.                                                     | Web   | Presentation & Discussion   |
|                                                              | Preparation for Grant Proposal Submission                   | Finalizing grant proposal submission plans.                                                                                  | Phone | Team Activity               |
|                                                              | Mock Review Preparation Webinar                             | Learn how to prepare for a grant review.                                                                                     | Web   | Presentation & Discussion   |
|                                                              | Mock Review                                                 | Learn how grant reviews are held.                                                                                            | FTF   | Team & Large Group Activity |
